# Supplementary material for: Rational design of an ionic liquid dispersive liquid–liquid micro-extraction method for the detection of organophosphorus pesticides
Source: Royal Society of Chemistry journal article supplement (doi:10.1039/c9an00123a), 2019-01-01
Supplement: c9an00123a1.pdf [file c9an00123a1.pdf]

## SUPPLEMENTARY DATA

### **Rational design of ionic liquid dispersive liquid–liquid micro-extraction for the detection of organophosphorus pesticides**

Dingkun Lu,<sup>a, c</sup> Chang Liu,<sup>a, c</sup> Jingjing Deng,<sup>a, c</sup> Xinguang Zhou,<sup>b, c</sup> Guoyue Shi<sup>b</sup> and Tianshu Zhou<sup>\*a, c</sup>

<sup>a</sup> School of Ecological and Environmental Sciences, Shanghai Key Lab for Urban Ecological Process and Eco-Restoration, East China Normal University, 500 Dongchuan Road, Shanghai 200241, China.

<sup>b</sup> School of Chemistry and Molecular Engineering, East China Normal University, 500 Dongchuan Road, Shanghai 200241, China.

<sup>c</sup> Institute of Eco-Chongming (IEC), 3663 North Zhongshan Road, Shanghai 20062

*\*Corresponding author email: [tszhou@des.ecnu.edu.cn](mailto:tszhou@des.ecnu.edu.cn)*

## Supporting Figures

**Fig. S1**

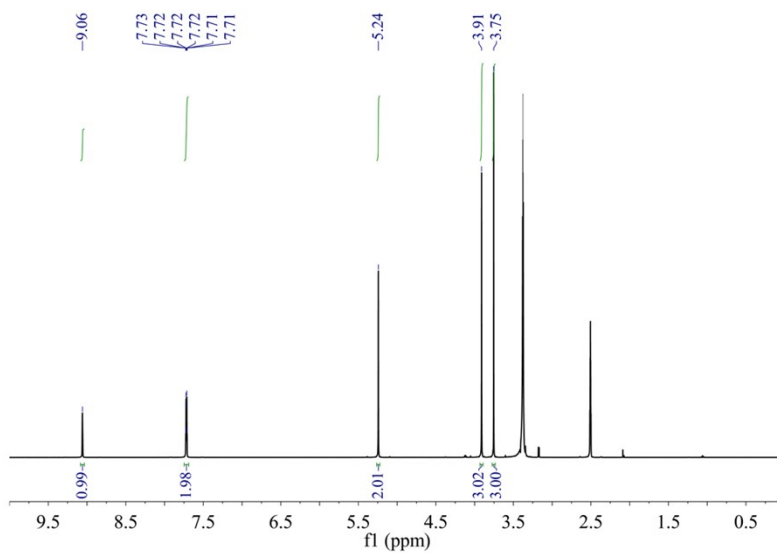

**Fig. S1.**  $^1\text{H}$  NMR (500 MHz,  $d_6$ -DMSO) spectrum of  $[\text{MimCH}_2\text{COOCH}_3][\text{NTf}_2]$   $\delta$  9.06 (s, 1H, N-CH-N), 7.72 (dt, 2H, N-CH=CH-N), 5.24 (s, 2H, C-CH<sub>2</sub>-N), 3.91 (s, 3H, N-CH<sub>3</sub>), 3.75 (s, 3H, C-CH<sub>3</sub>). The peaks of  $d_6$ -DMSO and water are not marked, respectively, corresponding to around 2.5, 3.4 ppm.

**Fig. S2**

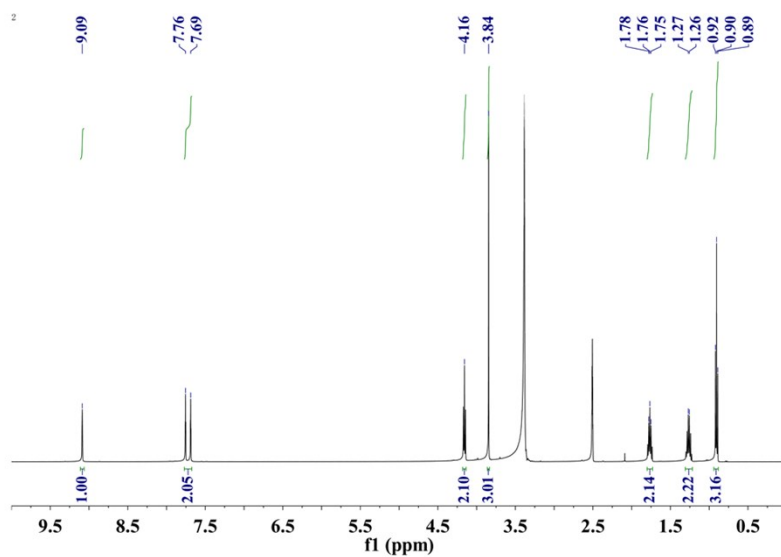

**Fig. S2.** <sup>1</sup>H NMR (500 MHz, d<sub>6</sub>-DMSO) spectrum of [Bmim][NTf<sub>2</sub>] δ 9.09 (s, 1H, N-CH-N), 7.72 (dt, 2H, N-CH=CH-N), 4.16 (s, 2H, C-CH<sub>2</sub>-N), 3.84 (s, 3H, N-CH<sub>3</sub>), 1.77 (dq, 2H, C-C-CH<sub>2</sub>-C-N), 1.26 (dd, 2H, C-CH<sub>2</sub>-C-C-N), 0.90 (s, 3H, C-CH<sub>3</sub>). The peaks of d<sub>6</sub>-DMSO and water are not marked, respectively, corresponding to around 2.5, 3.4 ppm.

**Fig. S3**

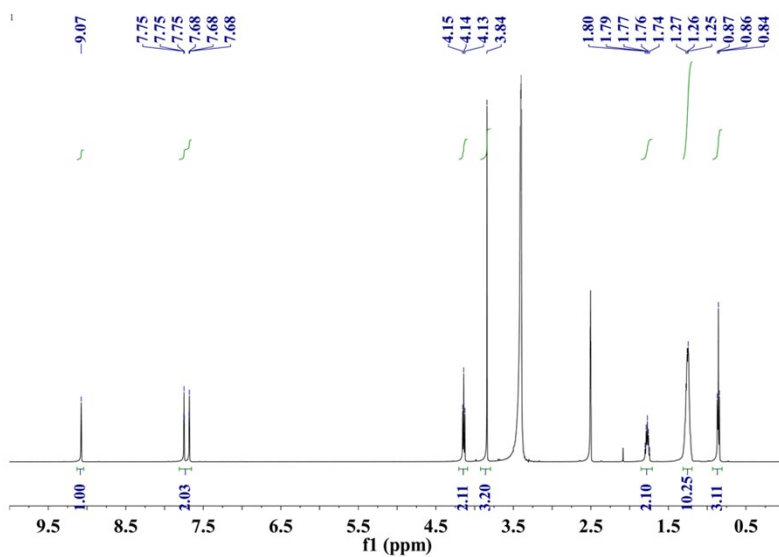

**Fig. S3.** <sup>1</sup>H NMR (500 MHz, d<sub>6</sub>-DMSO) spectrum of [Omim][NTf<sub>2</sub>] δ 9.07 (s, 1H, N-CH-N), 7.71 (dt, 2H, N-CH=CH-N), 4.14 (s, 2H, C-CH<sub>2</sub>-N), 3.84 (s, 3H, N-CH<sub>3</sub>), 1.85 – 1.71 (dq, 2H, C-C-CH<sub>2</sub>-C-N), 1.31 – 1.20 (m, 10H, C-(CH<sub>2</sub>)<sub>5</sub>-C-C-N), 0.86 (s, 3H, C-CH<sub>3</sub>). The peaks of d<sub>6</sub>-DMSO and water are not marked, respectively, corresponding to around 2.5, 3.4 ppm.

**Fig. S4**

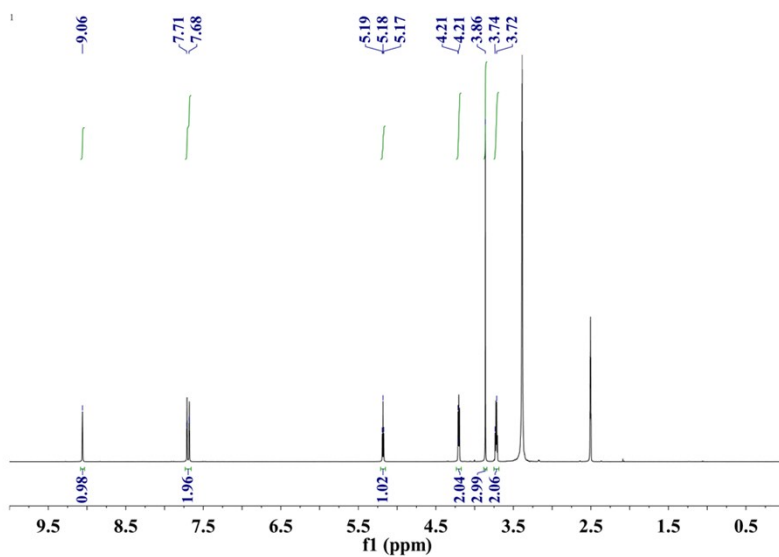

**Fig. S4.**  $^1\text{H}$  NMR (500 MHz,  $\text{d}_6\text{-DMSO}$ ) spectrum of  $[\text{Hemim}][\text{NTf}_2]$   $\delta$  9.06 (s, 1H, N-CH-N), 7.69 (dt, 2H, N-CH=CH-N), 5.18 (t, 1H, C-OH), 4.23 – 4.17 (s, 2H, N-CH<sub>2</sub>-C-OH), 3.86 (s, 3H, N-CH<sub>3</sub>), 3.72 (dd, 2H, N-C-CH<sub>2</sub>-OH). The peaks of  $\text{d}_6\text{-DMSO}$  and water are not marked, respectively, corresponding to around 2.5, 3.4 ppm.

## Supporting Table

Table. S1. The chemical shift of the  $^1\text{H}$  NMR (500 MHz,  $d_6$ -DMSO) spectrum

|                  | Pure IL       | After addition of OP | Chemical shift |
|------------------|---------------|----------------------|----------------|
| $\alpha$ H of IL | 9.0589        | 8.9873               | 0.0716         |
| $\beta$ H of IL  | 7.7088-7.7265 | 7.6193-7.6266        | 0.0895-0.0999  |
